# Supplementary material for: Prognostic Implications of Right Ventricular Function and Pulmonary Pressures Assessed by Echocardiography in Hospitalized Patients with COVID-19
Source: MDPI journal article supplement (doi:10.3390/jpm11121245), 2021-11-24
Supplement: s1 [file s1]

# Supplementary Materials:

**Table S1.** Characteristics of the study population stratified by TAPSE tertiles.

|                                                   | <b>TAPSE≤19</b>         | <b>19&lt;TAPSE≤22</b>   | <b>TAPSE&gt;22</b>      | <b>p</b> |
|---------------------------------------------------|-------------------------|-------------------------|-------------------------|----------|
| Patients, n                                       | 77                      | 75                      | 75                      |          |
| <b>Demographics</b>                               |                         |                         |                         |          |
| Male gender, n (%)                                | 46 (59.7)               | 53 (70.7)               | 43 (57.3)               | 0.198    |
| Age, years                                        | 76.00<br>[67.00, 83.00] | 69.00<br>[60.00, 77.00] | 65.00<br>[54.50, 74.50] | <0.001   |
| <b>Medical history</b>                            |                         |                         |                         |          |
| Smoker, n (%)                                     | 24 (31.2)               | 8 (10.7)                | 10 (13.3)               | 0.002    |
| Hypertension, n (%)                               | 53 (68.8)               | 47 (62.7)               | 39 (52.0)               | 0.099    |
| Diabetes, n (%)                                   | 27 (35.1)               | 21 (28.0)               | 16 (21.3)               | 0.170    |
| Dyslipidaemia, n (%)*                             | 24 (34.3)               | 22 (29.7)               | 16 (27.6)               | 0.698    |
| CKD, n (%)                                        | 27 (35.1)               | 8 (10.7)                | 10 (13.3)               | <0.001   |
| COPD, n (%)                                       | 26 (33.8)               | 9 (12.0)                | 11 (14.7)               | 0.001    |
| Cancer, n (%)                                     | 6 (7.8)                 | 11 (14.7)               | 10 (13.3)               | 0.380    |
| History of AF, n (%)**                            | 19 (24.7)               | 13 (17.6)               | 14 (18.7)               | 0.503    |
| Previous Stroke, n (%)                            | 9 (11.7)                | 6 (8.0)                 | 3 (4.0)                 | 0.215    |
| Heart Failure, n (%)                              | 14 (18.2)               | 6 (8.0)                 | 2 (2.7)                 | 0.004    |
| CAD, n (%)                                        | 17 (22.1)               | 10 (13.3)               | 8 (10.7)                | 0.124    |
| Prior MI, n (%)                                   | 20 (26.0)               | 10 (13.3)               | 7 (9.3)                 | 0.015    |
| Prior PCI, n (%)                                  | 18 (23.4)               | 12 (16.0)               | 6 (8.0)                 | 0.034    |
| Prior CABG, n (%)                                 | 8 (10.4)                | 4 (5.3)                 | 1 (1.3)                 | 0.055    |
| PM/ICD/CRT, n (%)                                 | 3 (3.9)                 | 5 (6.7)                 | 1 (1.3)                 | 0.246    |
| <b>Symptoms at presentation</b>                   |                         |                         |                         |          |
| Fever, n (%)                                      | 58 (75.3)               | 45 (60.0)               | 51 (68.0)               | 0.129    |
| Dyspnoea, n (%)                                   | 54 (70.1)               | 59 (78.7)               | 45 (60.0)               | 0.045    |
| Cough, n (%)                                      | 34 (44.2)               | 23 (30.7)               | 30 (40.0)               | 0.217    |
| Chest discomfort, n (%)                           | 31 (40.3)               | 21 (28.0)               | 17 (22.7)               | 0.053    |
| GI symptoms, n (%)                                | 13 (16.9)               | 7 (9.3)                 | 10 (13.3)               | 0.389    |
| Symptoms onset to hospitalization, days           | 4.00<br>[2.00, 7.00]    | 6.00<br>[1.00, 10.00]   | 7.00<br>[4.00, 10.00]   | 0.001    |
| <b>Pharmacological therapy at hospitalization</b> |                         |                         |                         |          |
| ACEi or ARB, n (%)                                | 42 (54.5)               | 33 (44.0)               | 24 (32.0)               | 0.020    |
| Betablocker, n (%)                                | 22 (28.6)               | 16 (21.3)               | 21 (28.0)               | 0.530    |
| Diuretic, n (%)                                   | 28 (36.4)               | 8 (10.7)                | 11 (14.7)               | <0.001   |
| P2Y12 inhibitor, n (%)                            | 13 (16.9)               | 4 (5.3)                 | 4 (5.3)                 | 0.018    |
| ASA, n (%)                                        | 29 (37.7)               | 22 (29.3)               | 16 (21.3)               | 0.088    |

|                                           |                           |                           |                          |        |
|-------------------------------------------|---------------------------|---------------------------|--------------------------|--------|
| Statin, n (%)                             | 34 (44.2)                 | 21 (28.0)                 | 16 (21.3)                | 0.008  |
| Insulin, n (%)                            | 16 (20.8)                 | 12 (16.0)                 | 4 (5.3)                  | 0.020  |
| VKA or NOAC, n (%)                        | 17 (22.1)                 | 13 (17.3)                 | 12 (16.0)                | 0.597  |
| <b>Serum biomarkers</b>                   |                           |                           |                          |        |
| Troponin hs, n · 99th percentile; peak ∞  | 80.00<br>[21.40, 390.00]  | 6.86<br>[0.11, 85.46]     | 21.75<br>[7.43, 42.78]   | 0.002  |
| D-dimer, peak; ng/ml ¥                    | 1262.00 [417.50, 2462.50] | 35.20 [1.69, 510.00]      | 928.00 [459.00, 1888.00] | <0.001 |
| <b>Echocardiographic data</b>             |                           |                           |                          |        |
| LVEF, %                                   | 50.00<br>[40.00, 55.00]   | 55.00<br>[50.00, 58.00]   | 57.00<br>[55.00, 60.00]  | <0.001 |
| LVEDV, mL                                 | 99.00<br>[88.00, 117.00]  | 110.00<br>[92.00, 124.00] | 98.00<br>[88.50, 118.50] | 0.203  |
| LVESV, mL                                 | 48.00<br>[41.00, 60.30]   | 50.00<br>[40.00, 60.15]   | 44.00<br>[38.00, 51.00]  | 0.031  |
| TAPSE, mm                                 | 17.00<br>[14.00, 18.00]   | 21.00<br>[20.00, 21.00]   | 24.00<br>[23.00, 26.00]  | <0.001 |
| PASP, mmHg                                | 40.00 [35.00, 47.00]      | 30.00 [30.00, 38.00]      | 30.00 [28.00, 35.00]     | <0.001 |
| Moderate or severe MR, n (%)              | 20 (26.0)                 | 4 (5.3)                   | 12 (16.0)                | 0.002  |
| Moderate or severe TR, n (%)              | 32 (41.6)                 | 5 (6.7)                   | 11 (14.7)                | <0.001 |
| <b>SARS-COV 2 therapies</b>               |                           |                           |                          |        |
| Glucocorticoid, n (%)                     | 40 (51.9)                 | 24 (32.0)                 | 38 (50.7)                | 0.022  |
| Antiviral, n (%)                          | 42 (54.5)                 | 36 (48.0)                 | 41 (54.7)                | 0.644  |
| Antibiotics, n (%)                        | 59 (76.6)                 | 46 (61.3)                 | 62 (82.7)                | 0.009  |
| Tocilizumab, n (%) #                      | 0 (0.0)                   | 0 (0.0)                   | 1 (2.3)                  | 0.514  |
| Hydroxychloroquine, n (%)                 | 60 (77.9)                 | 56 (74.7)                 | 65 (86.7)                | 0.167  |
| UFH or LMWH, n (%) §                      | 61 (79.2)                 | 55 (75.3)                 | 68 (90.7)                | 0.042  |
| <b>In hospital data and complications</b> |                           |                           |                          |        |
| ICU, n (%)                                | 36 (46.8)                 | 24 (32.0)                 | 13 (17.3)                | 0.001  |
| IMV, n (%)                                | 32 (41.6)                 | 24 (32.0)                 | 12 (16.0)                | 0.002  |
| NIV, n (%)                                | 46 (59.7)                 | 28 (37.3)                 | 26 (34.7)                | 0.003  |
| ARDS, n (%)                               | 42 (54.5)                 | 35 (46.7)                 | 30 (40.0)                | 0.198  |
| Acute cardiac injury, n (%)               | 39 (50.6)                 | 18 (24.0)                 | 12 (16.0)                | <0.001 |
| Pulmonary embolism, n (%)                 | 20 (26.0)                 | 9 (12.0)                  | 3 (4.0)                  | <0.001 |
| Acute HF, n (%)                           | 30 (39.0)                 | 7 (9.3)                   | 2 (2.7)                  | <0.001 |
| Death, n (%)                              | 42 (54.5)                 | 20 (27.0)                 | 6 (8.0)                  | <0.001 |
| Hospitalization, days                     | 15.00 [8.00, 24.00]       | 18.00 [12.00, 28.00]      | 19.00 [10.50, 30.50]     | 0.016  |

**Table S2.** Characteristics of the study population stratified by PASP tertiles.

|                                                   | <b>PASP≤30</b>          | <b>30&lt;PASP≤38</b>    | <b>PASP&gt;38</b>       | <b>p</b> |
|---------------------------------------------------|-------------------------|-------------------------|-------------------------|----------|
| Patients, n                                       | 98                      | 54                      | 75                      |          |
| <b>Demographics</b>                               |                         |                         |                         |          |
| Male gender, n (%)                                | 68 (69.4)               | 32 (59.3)               | 42 (56.0)               | 0.167    |
| Age, years                                        | 63.50<br>[57.25, 74.75] | 73.00<br>[65.25, 79.00] | 75.00<br>[62.00, 81.00] | 0.001    |
| <b>Medical history</b>                            |                         |                         |                         |          |
| Smoker, n (%)                                     | 17 (17.3)               | 10 (18.5)               | 15 (20.0)               | 0.906    |
| Hypertension, n (%)                               | 53 (54.1)               | 39 (72.2)               | 47 (62.7)               | 0.085    |
| Diabetes, n (%)                                   | 27 (27.6)               | 12 (22.2)               | 25 (33.3)               | 0.377    |
| Dyslipidaemia, n (%)*                             | 25 (29.1)               | 16 (33.3)               | 21 (30.9)               | 0.876    |
| CKD, n (%)                                        | 6 (6.1)                 | 13 (24.1)               | 26 (34.7)               | <0.001   |
| COPD, n (%)                                       | 14 (14.3)               | 10 (18.5)               | 22 (29.3)               | 0.048    |
| Cancer, n (%)                                     | 15 (15.3)               | 3 (5.6)                 | 9 (12.0)                | 0.206    |
| History of AF, n (%)**                            | 13 (13.3)               | 14 (26.4)               | 19 (25.3)               | 0.068    |
| Previous Stroke, n (%)                            | 6 (6.1)                 | 8 (14.8)                | 4 (5.3)                 | 0.098    |
| Heart Failure, n (%)                              | 3 (3.1)                 | 5 (9.3)                 | 14 (18.7)               | 0.003    |
| CAD, n (%)                                        | 13 (13.3)               | 8 (14.8)                | 14 (18.7)               | 0.616    |
| Prior MI, n (%)                                   | 11 (11.2)               | 11 (20.4)               | 15 (20.0)               | 0.196    |
| Prior PCI, n (%)                                  | 13 (13.3)               | 8 (14.8)                | 15 (20.0)               | 0.472    |
| Prior CABG, n (%)                                 | 3 (3.1)                 | 3 (5.6)                 | 7 (9.3)                 | 0.212    |
| PM/ICD/CRT, n (%)                                 | 2 (2.0)                 | 4 (7.4)                 | 3 (4.0)                 | 0.268    |
| <b>Symptoms at presentation</b>                   |                         |                         |                         |          |
| Fever, n (%)                                      | 61 (62.2)               | 39 (72.2)               | 54 (72.0)               | 0.290    |
| Dyspnoea, n (%)                                   | 69 (70.4)               | 39 (72.2)               | 50 (66.7)               | 0.775    |
| Cough, n (%)                                      | 35 (35.7)               | 17 (31.5)               | 35 (46.7)               | 0.169    |
| Chest discomfort, n (%)                           | 28 (28.6)               | 13 (24.1)               | 28 (37.3)               | 0.237    |
| GI symptoms, n (%)                                | 8 (8.2)                 | 7 (13.0)                | 15 (20.0)               | 0.074    |
| Symptoms onset to hospitalization, days           | 7.00<br>[1.00, 10.00]   | 5.00<br>[2.00, 10.00]   | 5.50<br>[3.00, 9.25]    | 0.719    |
| <b>Pharmacological therapy at hospitalization</b> |                         |                         |                         |          |
| ACEi or ARB, n (%)                                | 37 (37.8)               | 24 (44.4)               | 38 (50.7)               | 0.235    |
| Betablocker, n (%)                                | 18 (18.4)               | 21 (38.9)               | 20 (26.7)               | 0.022    |
| Diuretic, n (%)                                   | 11 (11.2)               | 9 (16.7)                | 27 (36.0)               | <0.001   |
| P2Y12 inhibitor, n (%)                            | 5 (5.1)                 | 5 (9.3)                 | 11 (14.7)               | 0.099    |
| ASA, n (%)                                        | 25 (25.5)               | 18 (33.3)               | 24 (32.0)               | 0.507    |
| Statin, n (%)                                     | 27 (27.6)               | 16 (29.6)               | 28 (37.3)               | 0.371    |
| Insulin, n (%)                                    | 11 (11.2)               | 9 (16.7)                | 12 (16.0)               | 0.553    |

|                                           |                         |                             |                           |        |
|-------------------------------------------|-------------------------|-----------------------------|---------------------------|--------|
| VKA or NOAC, n (%)                        | 12 (12.2)               | 13 (24.1)                   | 17 (22.7)                 | 0.104  |
| <b>Serum biomarkers</b>                   |                         |                             |                           |        |
| Troponin hs, n · 99th percentile; peak ∞  | 6.86<br>[0.18, 22.25]   | 33.00<br>[10.72, 238.75]    | 150.00<br>[47.00, 475.00] | <0.001 |
| D-dimer, peak; ng/ml ¥                    | 56.00<br>[2.78, 894.25] | 568.00<br>[252.50, 1414.50] | 1500.00 [518.25, 3139.75] | <0.001 |
| <b>Echocardiographic data</b>             |                         |                             |                           |        |
| LVEF, %                                   | 55.00 [50.25, 60.00]    | 55.00 [50.00, 58.75]        | 51.00 [44.50, 58.00]      | 0.005  |
| LVEDV, mL                                 | 108.00 [90.00, 122.00]  | 97.00 [90.00, 119.00]       | 99.00 [85.00, 116.00]     | 0.137  |
| LVESV, mL                                 | 47.50 [40.00, 59.00]    | 48.00 [41.00, 53.00]        | 46.00 [37.00, 60.00]      | 0.920  |
| TAPSE, mm                                 | 22.00 [20.00, 24.00]    | 20.50 [18.25, 23.00]        | 18.00 [14.50, 20.50]      | <0.001 |
| PASP, mmHg                                | 29.00 [25.00, 30.00]    | 35.00 [32.00, 37.00]        | 45.00 [40.00, 50.00]      | <0.001 |
| Moderate or severe MR, n (%)              | 2 (2.0)                 | 12 (22.2)                   | 22 (29.3)                 | <0.001 |
| Moderate or severe TR, n (%)              | 0 (0.0)                 | 9 (16.7)                    | 39 (52.0)                 | <0.001 |
| <b>SARS-COV 2 therapies</b>               |                         |                             |                           |        |
| Glucocorticoid, n (%)                     | 43 (43.9)               | 22 (40.7)                   | 37 (49.3)                 | 0.602  |
| Antiviral, n (%)                          | 57 (58.2)               | 25 (46.3)                   | 37 (49.3)                 | 0.302  |
| Antibiotics, n (%)                        | 75 (76.5)               | 35 (64.8)                   | 57 (76.0)                 | 0.247  |
| Tocilizumab, n (%) #                      | 1 (1.8)                 | 0 (0.0)                     | 0 (0.0)                   | 0.671  |
| Hydroxychloroquine, n (%)                 | 84 (85.7)               | 40 (74.1)                   | 57 (76.0)                 | 0.143  |
| UFH or LMWH, n (%) §                      | 82 (84.5)               | 43 (79.6)                   | 59 (79.7)                 | 0.647  |
| <b>In hospital data and complications</b> |                         |                             |                           |        |
| ICU, n (%)                                | 28 (28.6)               | 12 (22.2)                   | 33 (44.0)                 | 0.020  |
| IMV, n (%)                                | 26 (26.5)               | 9 (16.7)                    | 33 (44.0)                 | 0.002  |
| NIV, n (%)                                | 39 (39.8)               | 20 (37.0)                   | 41 (54.7)                 | 0.073  |
| ARDS, n (%)                               | 46 (46.9)               | 18 (33.3)                   | 43 (57.3)                 | 0.027  |
| Acute cardiac injury, n (%)               | 21 (21.4)               | 12 (22.2)                   | 36 (48.0)                 | <0.001 |
| Pulmonary embolism, n (%)                 | 7 (7.1)                 | 6 (11.1)                    | 19 (25.3)                 | 0.002  |
| Acute HF, n (%)                           | 8 (8.2)                 | 6 (11.1)                    | 25 (33.3)                 | <0.001 |
| Death, n (%)                              | 19 (19.6)               | 9 (16.7)                    | 40 (53.3)                 | <0.001 |
| Hospitalization, days                     | 16.50 [10.00, 32.00]    | 16.50 [12.00, 29.00]        | 15.00 [8.00, 25.00]       | 0.107  |

**Table S3.** Characteristics of the study population stratified by TAPSE/PASP tertiles.

|                                                       | <b>TAPSE/PASP<br/>≤0.5</b> | <b>0.5<br/>&lt;TAPSE/PASP≤<br/>0.72</b> | <b>TAPSE/PASP<br/>&gt;0.72</b> | <b>P</b> |
|-------------------------------------------------------|----------------------------|-----------------------------------------|--------------------------------|----------|
| Patients, n                                           | 78                         | 73                                      | 76                             |          |
| <b>Demographics</b>                                   |                            |                                         |                                |          |
| Male gender, n (%)                                    | 45 (57.7)                  | 47 (64.4)                               | 50 (65.8)                      | 0.540    |
| Age, years                                            | 75.00<br>[62.75, 80.00]    | 72.00<br>[64.00, 80.00]                 | 62.00<br>[55.00, 73.00]        | <0.001   |
| <b>Medical history</b>                                |                            |                                         |                                |          |
| Smoker, n (%)                                         | 22 (28.2)                  | 8 (11.0)                                | 12 (15.8)                      | 0.018    |
| Hypertension, n (%)                                   | 53 (67.9)                  | 46 (63.0)                               | 40 (52.6)                      | 0.139    |
| Diabetes, n (%)                                       | 24 (30.8)                  | 22 (30.1)                               | 18 (23.7)                      | 0.561    |
| Dyslipidaemia, n (%)*                                 | 23 (32.4)                  | 25 (36.2)                               | 14 (22.6)                      | 0.222    |
| CKD, n (%)                                            | 27 (34.6)                  | 13 (17.8)                               | 5 (6.6)                        | <0.001   |
| COPD, n (%)                                           | 25 (32.1)                  | 11 (15.1)                               | 10 (13.2)                      | 0.006    |
| Cancer, n (%)                                         | 8 (10.3)                   | 9 (12.3)                                | 10 (13.2)                      | 0.848    |
| History of AF, n (%)**                                | 20 (25.6)                  | 14 (19.4)                               | 12 (15.8)                      | 0.308    |
| Previous Stroke, n (%)                                | 6 (7.7)                    | 8 (11.0)                                | 4 (5.3)                        | 0.435    |
| Heart Failure, n (%)                                  | 15 (19.2)                  | 5 (6.8)                                 | 2 (2.6)                        | 0.001    |
| CAD, n (%)                                            | 16 (20.5)                  | 9 (12.3)                                | 10 (13.2)                      | 0.304    |
| Prior MI, n (%)                                       | 18 (23.1)                  | 12 (16.4)                               | 7 (9.2)                        | 0.066    |
| Prior PCI, n (%)                                      | 16 (20.5)                  | 13 (17.8)                               | 7 (9.2)                        | 0.136    |
| Prior CABG, n (%)                                     | 7 (9.0)                    | 4 (5.5)                                 | 2 (2.6)                        | 0.237    |
| PM/ICD/CRT, n (%)                                     | 4 (5.1)                    | 4 (5.5)                                 | 1 (1.3)                        | 0.347    |
| <b>Symptoms at presentation</b>                       |                            |                                         |                                |          |
| Fever, n (%)                                          | 62 (79.5)                  | 42 (57.5)                               | 50 (65.8)                      | 0.014    |
| Dyspnoea, n (%)                                       | 54 (69.2)                  | 55 (75.3)                               | 49 (64.5)                      | 0.352    |
| Cough, n (%)                                          | 37 (47.4)                  | 20 (27.4)                               | 30 (39.5)                      | 0.039    |
| Chest discomfort, n (%)                               | 28 (35.9)                  | 22 (30.1)                               | 19 (25.0)                      | 0.339    |
| GI symptoms, n (%)                                    | 17 (21.8)                  | 5 (6.8)                                 | 8 (10.5)                       | 0.018    |
| Symptoms onset to<br>hospitalization, days            | 5.00<br>[3.00, 7.00]       | 6.00<br>[1.00, 10.00]                   | 7.00<br>[3.00, 10.00]          | 0.312    |
| <b>Pharmacological therapy at<br/>hospitalization</b> |                            |                                         |                                |          |
| ACEi or ARB, n (%)                                    | 45 (57.7)                  | 29 (39.7)                               | 25 (32.9)                      | 0.006    |
| Betablocker, n (%)                                    | 25 (32.1)                  | 19 (26.0)                               | 15 (19.7)                      | 0.219    |
| Diuretic, n (%)                                       | 30 (38.5)                  | 8 (11.0)                                | 9 (11.8)                       | <0.001   |
| P2Y12 inhibitor, n (%)                                | 12 (15.4)                  | 5 (6.8)                                 | 4 (5.3)                        | 0.066    |
| ASA, n (%)                                            | 26 (33.3)                  | 26 (35.6)                               | 15 (19.7)                      | 0.069    |
| Statin, n (%)                                         | 33 (42.3)                  | 22 (30.1)                               | 16 (21.1)                      | 0.017    |
| Insulin, n (%)                                        | 14 (17.9)                  | 14 (19.2)                               | 4 (5.3)                        | 0.025    |

|                                           |                           |                           |                           |        |
|-------------------------------------------|---------------------------|---------------------------|---------------------------|--------|
| VKA or NOAC, n (%)                        | 19 (24.4)                 | 13 (17.8)                 | 10 (13.2)                 | 0.198  |
| <b>Serum biomarkers</b>                   |                           |                           |                           |        |
| Troponin hs, n · 99th percentile; peak ∞  | 150.00<br>[42.45, 525.00] | 15.40<br>[0.15, 69.94]    | 9.00<br>[2.10, 23.00]     | <0.001 |
| D-dimer, peak; ng/ml ¥                    | 1616.00 [564.75, 2605.00] | 106.50 [4.30, 621.00]     | 549.50 [31.30, 1681.75]   | <0.001 |
| <b>Echocardiographic data</b>             |                           |                           |                           |        |
| LVEF, %                                   | 50.00<br>[43.25, 55.75]   | 55.00<br>[50.00, 58.00]   | 56.00<br>[55.00, 60.00]   | <0.001 |
| LVEDV, mL                                 | 96.00<br>[85.00, 116.00]  | 105.00<br>[89.00, 127.00] | 108.00<br>[92.50, 120.00] | 0.163  |
| LVESV, mL                                 | 46.00<br>[39.00, 60.00]   | 49.25<br>[39.00, 60.00]   | 46.00<br>[40.00, 53.00]   | 0.504  |
| TAPSE, mm                                 | 17.00<br>[14.25, 19.00]   | 21.00<br>[20.00, 23.00]   | 24.00<br>[22.00, 26.00]   | <0.001 |
| PASP, mmHg                                | 44.50 [40.00, 50.00]      | 32.00 [30.00, 37.00]      | 28.00 [25.00, 30.00]      | <0.001 |
| Moderate or severe MR, n (%)              | 21 (26.9)                 | 9 (12.3)                  | 6 (7.9)                   | 0.003  |
| Moderate or severe TR, n (%)              | 37 (47.4)                 | 9 (12.3)                  | 2 (2.6)                   | <0.001 |
| <b>SARS-COV 2 therapies</b>               |                           |                           |                           |        |
| Glucocorticoid, n (%)                     | 41 (52.6)                 | 24 (32.9)                 | 37 (48.7)                 | 0.038  |
| Antiviral, n (%)                          | 37 (47.4)                 | 37 (50.7)                 | 45 (59.2)                 | 0.321  |
| Antibiotics, n (%)                        | 58 (74.4)                 | 50 (68.5)                 | 59 (77.6)                 | 0.441  |
| Tocilizumab, n (%) #                      | 0 (0.0)                   | 0 (0.0)                   | 1 (2.3)                   | 0.514  |
| Hydroxychloroquine, n (%)                 | 57 (73.1)                 | 59 (80.8)                 | 65 (85.5)                 | 0.152  |
| UFH or LMWH, n (%) §                      | 60 (77.9)                 | 60 (82.2)                 | 64 (85.3)                 | 0.493  |
| <b>In hospital data and complications</b> |                           |                           |                           |        |
| ICU, n (%)                                | 35 (44.9)                 | 19 (26.0)                 | 19 (25.0)                 | 0.012  |
| IMV, n (%)                                | 32 (41.0)                 | 18 (24.7)                 | 18 (23.7)                 | 0.031  |
| NIV, n (%)                                | 44 (56.4)                 | 30 (41.1)                 | 26 (34.2)                 | 0.018  |
| ARDS, n (%)                               | 38 (48.7)                 | 38 (52.1)                 | 31 (40.8)                 | 0.365  |
| Acute cardiac injury, n (%)               | 37 (47.4)                 | 19 (26.0)                 | 13 (17.1)                 | <0.001 |
| Pulmonary embolism, n (%)                 | 21 (26.9)                 | 7 (9.6)                   | 4 (5.3)                   | <0.001 |
| Acute HF, n (%)                           | 25 (32.1)                 | 12 (16.4)                 | 2 (2.6)                   | <0.001 |
| Death, n (%)                              | 42 (53.8)                 | 14 (19.4)                 | 12 (15.8)                 | <0.001 |
| Hospitalization, days                     | 15.00 [8.00, 24.00]       | 19.00 [13.00, 30.00]      | 16.00 [10.00, 31.50]      | 0.012  |
